# Supplementary material for: Studies of the Anti-amnesic Effects and Mechanisms of Single and Combined Use of Donepezil and Ginkgo Ketoester Tablet on Scopolamine-Induced Memory Impairment in Mice
Source: Hindawi journal article supplement (doi:10.1155/2019/8636835), 2019-02-18
Supplement: f1 [file 8636835.f1.pdf]

1 ***Supporting Information***

2

3 *Docking Study of Ginkgolide J, P and Q* From Figure S1A and Table S1, ginkgolide  
4 J established H-bonding with amino acid residues Tyr70 and hydrophobic interactions  
5 interactions with Ile287, Phe331, Tyr334, Phe290, Gly335, Ser286, Trp279, Gln74 and  
6 Tyr121 inside AChE. The illustration of molecular docking for the interactions of  
7 ginkgolide P and AChE was shown in Figure S1B and Table S1. Ginkgolide P formed  
8 4 hydrophobic interactions with different residues namely Gln74, Tyr121, Tyr334 and  
9 Trp279. Moreover, a hydrogen bonding interaction with residue like Tyr70 was also  
10 observed. The molecular docking model of ginkgolide C is illustrated in Figure 9C and  
11 Table S1. Ginkgolide Q formed 2 hydrogen bonding interactions with residues like  
12 Tyr70 and Tyr121. Ginkgolide Q also formed five hydrophobic interactions with  
13 Tyr334, Phe290, Gly335, Trp279 and Gln74 located in AChE.

14

15

TABLE S1: Docking scores and interactions of compounds (Ginkgolide J, P and

16

Q) with AChE.

| Compounds    | Glide Score (kcal/mol) | No of H-bonds | H-bonds interacting residues | Van der Waals interacting residues                                    |
|--------------|------------------------|---------------|------------------------------|-----------------------------------------------------------------------|
| Ginkgolide_J | -6.1                   | 1             | Tyr70                        | Ile287, Phe331, Tyr334, Phe290, Gly335, Ser286, Trp279, Gln74, Tyr121 |
| Ginkgolide_P | -6.5                   | 1             | Tyr70                        | Gln74, Tyr121, Tyr334, Trp279                                         |
| Ginkgolide_Q | -6.2                   | 2             | Tyr70, Tyr121                | Tyr334, Phe290, Gly335, Trp279, Gln74                                 |

17

18

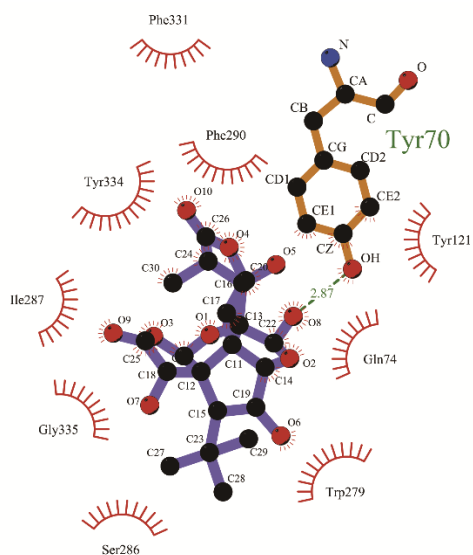

(A)

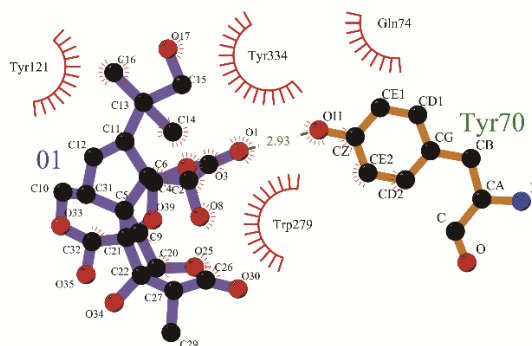

(B)

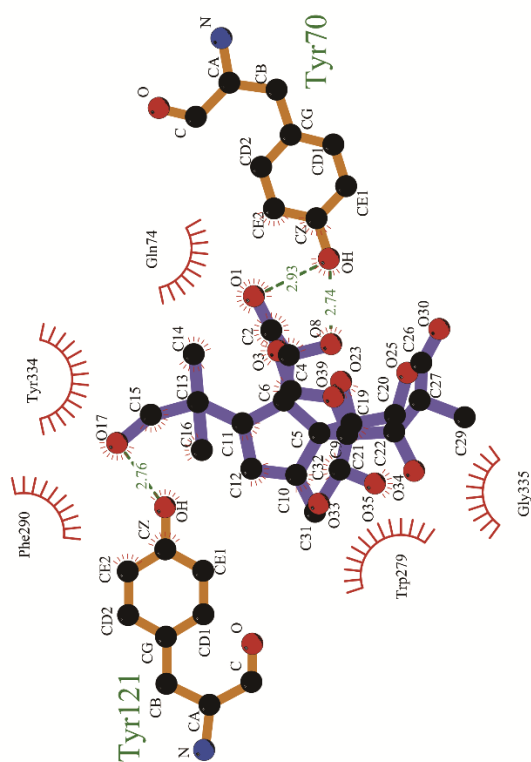

(C)

19  
20  
21

22  
23

24 FIGURE S1: 2D ligand interaction diagram of AChE inhibition by ginkgolide J (A), ginkgolide P  
25 (B) and ginkgolide Q (C). Green and red dashed lines were indicated hydrogen and hydrophobic  
26 bonds, respectively. Carbons are in black, nitrogens in blue and oxygens in red.
